# Supplementary material for: Oligodendrocytes and myelin limit neuronal plasticity in visual cortex
Source: PubMed Central journal article supplement (PMC11424474; doi:10.1038/s41586-024-07853-8), 2024-08-21
Supplement: 41586_2024_7853_MOESM1_ESM.pdf [file 41586_2024_7853_MOESM1_ESM.pdf]

---

**Supplementary information**

---

**Oligodendrocytes and myelin limit neuronal  
plasticity in visual cortex**

---

In the format provided by the  
authors and unedited

## Supplementary Tables

**Table S1 | Statistical analysis**

| Figure | Sample size                    | Statistical test                                                                                                     | Values                                                                                                                                                                                                                                               |
|--------|--------------------------------|----------------------------------------------------------------------------------------------------------------------|------------------------------------------------------------------------------------------------------------------------------------------------------------------------------------------------------------------------------------------------------|
| 1h     | 8 mice                         | Paired t-test (two-tailed)                                                                                           | t = 5.494, p = 0.0009                                                                                                                                                                                                                                |
| 1i     | 8 mice                         | Paired t-test (two-tailed)                                                                                           | t = 3.06, p = 0.0183                                                                                                                                                                                                                                 |
| 1j     | 8 mice                         | Paired t-test (two-tailed)                                                                                           | t = 0.3199, p = 0.7584                                                                                                                                                                                                                               |
| 1k     | 8 mice                         | Paired t-test (two-tailed)                                                                                           | t = 3.84, p = 0.0064                                                                                                                                                                                                                                 |
| 1l     | 5 mice                         | Paired t-test (two-tailed)                                                                                           | t = 3.867, p = 0.018                                                                                                                                                                                                                                 |
| 1m     | 5 mice                         | Paired t-test (two-tailed)                                                                                           | t = 1.64, p = 0.1763                                                                                                                                                                                                                                 |
| 2b     | 3-6 mice per age, per genotype | Two-way ANOVA followed by Sidak's multiple comparisons test                                                          | Genotype:<br>F = 165.9, p < 0.0001<br>Interaction:<br>F = 9.55, p = 0.0002<br><br>CTL – cKO<br>P28: p = 0.1808<br>P35: p < 0.0001<br>P45: p < 0.0001<br>P60: p < 0.0001                                                                              |
| 2c     | 3-4 mice per age, per genotype | Two-way ANOVA followed by Sidak's multiple comparisons test                                                          | Genotype:<br>F = 0.7504, p = 0.7504<br>Interaction:<br>F = 0.0979, p = 0.7608<br><br>CTL vs cKO<br>P28: p > 0.9999<br>P60: p = 0.8672                                                                                                                |
| 2i     | 8-9 mice per genotype          | Two-way ANOVA followed by Sidak's multiple comparisons test                                                          | Genotype:<br>F = 30.64, p < 0.0001<br>Interaction:<br>F = 0.4264, p = 0.5237                                                                                                                                                                         |
| 2j     | 8 mice                         | Two one-way repeated measures ANOVAs (one for contra and one for ipsi) followed by Tukey's multiple comparisons test | Contra<br>F = 1.733, p = 0.1804<br>Baseline vs MD4: p = 0.9863<br>Baseline vs MD8: p = 0.1922<br>MD4 vs MD8: p = 0.1814<br><br>Ipsi<br>F = 30.17, p < 0.0001<br>Baseline vs MD4: p = 0.5364<br>Baseline vs MD8: p = 0.0004<br>MD4 vs MD8: p = 0.0015 |
| 2k     | 9 mice                         | Two one-way repeated measures ANOVAs (one for contra and one for ipsi) followed by Tukey's multiple comparisons test | Contra<br>F = 66.55, p < 0.0001<br>Baseline vs MD4: p = 0.0002<br>Baseline vs MD8: p < 0.0001<br>MD4 vs MD8: p = 0.0015<br><br>Ipsi<br>F = 20.66, p < 0.0001<br>Baseline vs MD4: p = 0.0575<br>Baseline vs MD8: p = 0.0013<br>MD4 vs MD8: p = 0.0053 |
| 2l     | 8-9 mice per genotype          | Unpaired t-test (two-tailed)                                                                                         | t = 5.082, p = 0.0001                                                                                                                                                                                                                                |
| 2m     | 8-9 mice per genotype          | Two-way ANOVA followed by Sidak's multiple comparisons test                                                          | Genotype:<br>F = 36.22, p < 0.0001<br>Interaction:<br>F = 15.62, p < 0.0001<br><br>CTL vs cKO<br>MD 4d: p = 0.0003<br>MD 8d: p = 0.0007<br>Rec 4d: p = 0.0002<br>Rec 8d: p = 0.0013                                                                  |

|    |                                                                   |                                                                                    |                                                                                                                                                                                     |
|----|-------------------------------------------------------------------|------------------------------------------------------------------------------------|-------------------------------------------------------------------------------------------------------------------------------------------------------------------------------------|
| 2n | 8-9 mice per genotype                                             | Two-way ANOVA followed by Sidak's multiple comparisons test                        | Genotype:<br>F = 1.247, p = 0.3008<br>Interaction:<br>F = 1.922, p = 0.1859<br><br>CTL vs cKO<br>MD 4d: p = 0.5115<br>MD 8d: p = 0.9725<br>Rec 4d: p = 0.2595<br>Rec 8d: p = 0.9961 |
| 3d | 10 control mice (111 dendrites)<br><br>10 cKO mice (97 dendrites) | Two-way repeated measures ANOVA followed by Holm-Sidak's multiple comparisons test | Genotype:<br>F = 7.394, p = 0.0071<br>Interaction:<br>F = 2.115, p = 0.0972<br><br>CTL vs cKO<br>Day -2: p = 0.0311<br>Day 0: p = 0.0103<br>Day 2: p = 0.0095<br>Day 4: p = 0.0391  |
| 3e | 10 control mice (111 dendrites)<br><br>10 cKO mice (97 dendrites) | Mixed-effects analysis (REML) followed by Holm-Sidak's multiple comparisons test   | Genotype:<br>F = 8.82, p = 0.0033<br>Interaction:<br>F = 0.6344, p = 0.5931<br><br>CTL vs cKO<br>Day -2: p = 0.3037<br>Day 0: p = 0.0103<br>Day 2: p = 0.0178<br>Day 4: p = 0.0586  |
| 3f | 10 control mice (111 dendrites)<br><br>10 cKO mice (97 dendrites) | Mixed-effects analysis (REML) followed by Holm-Sidak's multiple comparisons test   | Genotype:<br>F = 13.9, p = 0.0002<br>Interaction:<br>F = 1.101, p = 0.3484<br><br>CTL vs cKO<br>Day -2: p = 0.0288<br>Day 0: p = 0.0048<br>Day 2: p = 0.0521<br>Day 4: p = 0.192    |
| 3g | 10 control mice (111 dendrites)<br><br>10 cKO mice (97 dendrites) | Mixed-effects analysis (REML) followed by Holm-Sidak's multiple comparisons test   | Genotype:<br>F = 3.483, p = 0.0634<br>Interaction:<br>F = 0.9613, p = 0.4107<br><br>CTL vs cKO<br>Day -2: p = 0.7148<br>Day 0: p = 0.2422<br>Day 2: p = 0.1721<br>Day 4: p = 0.1721 |
| 3h | 10 control mice (111 dendrites)<br><br>10 cKO mice (97 dendrites) | Two-way repeated measures ANOVA followed by Holm-Sidak's multiple comparisons test | Genotype:<br>F = 2.471, p = 0.1175<br>Interaction:<br>F = 2.64, p = 0.0486<br><br>CTL vs cKO<br>Day -2: p = 0.7333<br>Day 0: p = 0.7241<br>Day 2: p = 0.9743<br>Day 4: p = 0.0110   |
| 4c | 10 control mice (110 dendrites)<br><br>10 cKO mice (96 dendrites) | Unpaired t-test (two-tailed)                                                       | t = 0.3287, p = 0.7427                                                                                                                                                              |
| 4d | 10 control mice (110 dendrites)                                   | Unpaired t-test (two-tailed)                                                       | t = 2.826, p = 0.0052                                                                                                                                                               |

|     |                                                                    |                                                                                                        |                        |
|-----|--------------------------------------------------------------------|--------------------------------------------------------------------------------------------------------|------------------------|
|     | 10 cKO mice (96 dendrites)                                         |                                                                                                        |                        |
| 4e  | 10 control mice (110 dendrites)                                    | Unpaired t-test (two-tailed)                                                                           | t = 2.56, p = 0.0112   |
|     | 10 cKO mice (96 dendrites)                                         |                                                                                                        |                        |
| 4f  | 10 control mice (110 dendrites)                                    | Unpaired t-test (two-tailed)                                                                           | t = 1.627, p = 0.1052  |
|     | 10 cKO mice (96 dendrites)                                         |                                                                                                        |                        |
| 4g  | 10 control mice (996 spine pairs)<br>10 cKO mice (704 spine pairs) | Monte Carlo p value calculated by summing the tail of the histogram from 10000 shuffled spine pairings | p = 0.686              |
| 4h  | 10 control mice (996 spine pairs)<br>10 cKO mice (704 spine pairs) | Monte Carlo p value calculated by summing the tail of the histogram from 10000 shuffled spine pairings | p = 0.939              |
| 4i  | 10 control mice (996 spine pairs)<br>10 cKO mice (704 spine pairs) | Monte Carlo p value calculated by summing the tail of the histogram from 10000 shuffled spine pairings | p = 0.913              |
| 4j  | 10 control mice (996 spine pairs)<br>10 cKO mice (704 spine pairs) | Monte Carlo p value calculated by summing the tail of the histogram from 10000 shuffled spine pairings | p = 0.66               |
| 4k  | 10 control mice (996 spine pairs)<br>10 cKO mice (704 spine pairs) | Monte Carlo p value calculated by summing the tail of the histogram from 10000 shuffled spine pairings | p = 0.862              |
| 4l  | 10 control mice (996 spine pairs)<br>10 cKO mice (704 spine pairs) | Monte Carlo p value calculated by summing the tail of the histogram from 10000 shuffled spine pairings | p = 0.001              |
| 4m  | 10 control mice (996 spine pairs)<br>10 cKO mice (704 spine pairs) | Monte Carlo p value calculated by summing the tail of the histogram from 10000 shuffled spine pairings | p = 0.002              |
| 4n  | 10 control mice (996 spine pairs)<br>10 cKO mice (704 spine pairs) | Monte Carlo p value calculated by summing the tail of the histogram from 10000 shuffled spine pairings | p = 0.022              |
| 5b  | 3 mice per genotype                                                | Unpaired t-test (two-tailed)                                                                           | t = 1.331, p = 0.2538  |
| 5c  | 3 mice per genotype                                                | Unpaired t-test (two-tailed)                                                                           | t = 1.635, p = 0.1773  |
| 5d  | 3 mice per genotype                                                | Unpaired t-test (two-tailed)                                                                           | t = 0.3877, p = 0.718  |
| 5g  | 5 control mice (15 cells)<br>5 cKO mice (14 cells)                 | Unpaired t-test (two-tailed)                                                                           | t = 4.195, p = 0.0003  |
| 5h  | 5 control mice (15 cells)<br>5 cKO mice (14 cells)                 | Unpaired t-test (two-tailed)                                                                           | t = 0.4712, p = 0.6413 |
| S1b | 8 mice                                                             | Paired t-test (two-tailed)                                                                             | t = 2.565, p = 0.0373  |
| S1c | 8 mice                                                             | Paired t-test (two-tailed)                                                                             | t = 2.176, p = 0.066   |
| S1f | 5 mice                                                             | Paired t-test (two-tailed)                                                                             | t = 3.637, p = 0.022   |
| S3b | 4-6 mice per genotype                                              | Unpaired t-test (two-tailed)                                                                           | t = 0.5169, p = 0.6237 |
| S3c | 4-6 mice per genotype                                              | Unpaired t-test (two-tailed)                                                                           | t = 2.653, p = 0.0291  |
| S3d | 4-6 mice per genotype                                              | Unpaired t-test (two-tailed)                                                                           | t = 3.995, p = 0.004   |
| S3e | 4-6 mice per genotype                                              | Unpaired t-test (two-tailed)                                                                           | t = 8.612, p = 0.0001  |
| S4c | 4-6 mice per genotype                                              | Unpaired t-test (two-tailed)                                                                           | t = 5.828, p = 0.0004  |
| S4d | 4-6 mice per genotype                                              | Unpaired t-test (two-tailed)                                                                           | t = 7.076, p = 0.0001  |
| S5b | 4-6 mice per genotype                                              | Unpaired t-test (two-tailed)                                                                           | t = 0.1984, p = 0.8477 |
| S5d | 4-5 mice per genotype                                              | Unpaired t-test (two-tailed)                                                                           | t = 3.461, p = 0.0105  |
| S5f | 4-6 mice per genotype                                              | Unpaired t-test (two-tailed)                                                                           | t = 2.982, p = 0.0176  |
| S5g | 4-6 mice per genotype                                              | Unpaired t-test (two-tailed)                                                                           | t = 2.195, p = 0.0594  |
| S6b | 4 mice per genotype                                                | Welch's t-test                                                                                         | t = 1.718, p = 0.1748  |
| S6c | 4 mice per genotype                                                | Unpaired t-test (two-tailed)                                                                           | t = 0.3735, p = 0.7216 |
| S6g | 4 mice per genotype                                                | Unpaired t-test (two-tailed)                                                                           | t = 0.595, p = 0.5736  |

|       |                                                            |                                                                                                 |                                                                                                                                                                                                         |
|-------|------------------------------------------------------------|-------------------------------------------------------------------------------------------------|---------------------------------------------------------------------------------------------------------------------------------------------------------------------------------------------------------|
| S6h   | 4 mice per genotype                                        | Unpaired t-test (two-tailed)                                                                    | t = 0.4586, p = 0.6627                                                                                                                                                                                  |
| S8b   | 8-9 mice per genotype                                      | Two-way ANOVA followed by Sidak's multiple comparisons test                                     | Genotype:<br>F = 55.3, p < 0.0001<br>Interaction:<br>F = 11.73, p < 0.0001<br><br>CTL vs cKO<br>Base: p = 0.0041<br>MD 4d: p < 0.0001<br>MD 8d: p = 0.0004<br>Rec 4d: p < 0.0001<br>Rec 8d: p = 0.0002  |
| S8c   | 8-9 mice per genotype                                      | Two-way ANOVA followed by Sidak's multiple comparisons test                                     | Genotype:<br>F = 42.31, p < 0.0001<br>Interaction:<br>F = 2.183, p = 0.0816<br><br>CTL vs cKO<br>Base: p = 0.0002<br>MD 4d: p = 0.0022<br>MD 8d: p = 0.0008<br>Rec 4d: p = 0.0009<br>Rec 8d: p = 0.0011 |
| S9b   | 10 control mice (3484 spines)<br>10 cKO mice (2438 spines) | Kolmogorov-Smirnov test                                                                         | p < 0.0001                                                                                                                                                                                              |
| S9c   | 10 control mice (3809 spines)                              | Pearson r correlation                                                                           | r = 0.4641, p < 0.0001                                                                                                                                                                                  |
| S9d   | 10 cKO mice (3484 spines)                                  | Pearson r correlation                                                                           | r = 0.5043, p < 0.0001                                                                                                                                                                                  |
| S9e   | 10 control mice (996 spine pairs)                          | Pearson r correlation                                                                           | r = 0.02819, p = 0.3742                                                                                                                                                                                 |
| S9f   | 10 cKO mice (704 spine pairs)                              | Pearson r correlation                                                                           | r = 0.1692, p < 0.0001                                                                                                                                                                                  |
| S9g,h | N/A                                                        | Example of one shuffled spine pairing as part of Monte Carlo simulation; no statistics involved | N/A                                                                                                                                                                                                     |
| S10b  | 5 control mice (15 cells)<br>5 cKO mice (14 cells)         | Unpaired t-test (two-tailed)                                                                    | t = 3.563, p = 0.0014                                                                                                                                                                                   |
| S10c  | 5 control mice (15 cells)<br>5 cKO mice (14 cells)         | Unpaired t-test (two-tailed)                                                                    | t = 0.1121, p = 0.9116                                                                                                                                                                                  |
| S10d  | 5 control mice (15 cells)<br>5 cKO mice (14 cells)         | Unpaired t-test (two-tailed)                                                                    | t = 2.029, p = 0.0525                                                                                                                                                                                   |
| S10e  | 5 control mice (15 cells)<br>5 cKO mice (14 cells)         | Unpaired t-test (two-tailed)                                                                    | t = 1.598, p = 0.1218                                                                                                                                                                                   |

**Table S2 | Antibodies**

| <b>Primary</b>                   |                          |                                   |                      |
|----------------------------------|--------------------------|-----------------------------------|----------------------|
| <i>Antibody</i>                  | <i>Source</i>            | <i>Identifier</i>                 | <i>Concentration</i> |
| Rabbit anti-ASPA                 | GeneTex                  | Cat# GTX113389; RRID AB_2036283   | 1:1000               |
| Chicken anti-GFP                 | Rockland                 | Cat# 600-901-215; RRID AB_1537403 | 1:1000               |
| Rat anti-MBP                     | Millipore                | Cat# MAB386; RRID AB_94975        | 1:200                |
| Rabbit anti-PDGFR $\alpha$       | W.B. Stallcup            | N/A                               | 1:200                |
| Mouse anti-Bcas1                 | Santa Cruz               | Cat# SC-136342; RRID AB_10839529  | 1:300                |
| Rabbit anti-Caspr                | Elior Peles              | N/A                               | 1:600                |
| Rabbit anti-cleaved Caspase3     | Cell Signaling           | Cat# 9661S; RRID AB_2341188       | 1:200                |
| Mouse anti-GFAP                  | Millipore                | Cat# MAB360; RRID AB_11212597     | 1:1000               |
| Goat anti-Sox9                   | R&D Systems              | Cat# AF3075; RRID AB_2194160      | 1:2000               |
| Rabbit anti-Iba1                 | Wako                     | Cat# 019-19741; RRID AB_839504    | 1:1000               |
| Mouse anti-NF-L Degenotag        | Encor                    | Cat# MCA-1D44; RRID AB_2923483    | 1:1000               |
| Rabbit anti-NF-H                 | Abcam                    | Cat# ab8135; RRID AB_306298       | 1:1000               |
| Mouse anti-PV                    | Swant                    | Cat# 235; RRID AB_10000343        | 1:1000               |
| Biotinylated WFA                 | Vector Labs              | Cat# B-1355; RRID AB_2336874      | 1:400                |
| <b>Secondary</b>                 |                          |                                   |                      |
| <i>Antibody</i>                  | <i>Source</i>            | <i>Identifier</i>                 | <i>Concentration</i> |
| Goat anti-rabbit AlexaFluor 488  | Thermo Fisher Scientific | Cat# A-11034; RRID:AB_2576217     | 1:1000               |
| Goat anti-rabbit AlexaFluor 594  | Thermo Fisher Scientific | Cat# A-11012; RRID:AB_2534079     | 1:1000               |
| Goat anti-rabbit AlexaFluor 647  | Thermo Fisher Scientific | Cat # A-21245; RRID:AB_2535813    | 1:1000               |
| Goat anti-chicken AlexaFluor 488 | Thermo Fisher Scientific | Cat # A-11039; RRID:AB_142924     | 1:1000               |
| Goat anti-rat AlexaFluor 647     | Thermo Fisher Scientific | Cat# A-21247; RRID:AB_141778      | 1:1000               |
| Goat anti-rat AlexaFluor 488     | Jackson ImmunoResearch   | Cat# 112-545-167; RRID:AB_2338362 | 1:1000               |
| Goat anti-mouse AlexaFluor 488   | Jackson ImmunoResearch   | Cat# 115-545-166; RRID:AB_2338852 | 1:1000               |
| Goat anti-mouse AlexaFluor 647   | Thermo Fisher Scientific | Cat# A-21236; RRID:AB_2535805     | 1:1000               |
| Goat anti-human AlexaFluor 594   | Thermo Fisher Scientific | Cat# A-11014; RRID:AB_2534081     | 1:1000               |
| Alexa Fluor® 594 Streptavidin    | Jackson ImmunoResearch   | Cat# 016-580-084; RRID:AB_2337250 | 1:1000               |
